# Supplementary material
Source: publisher figshare collection journal article supplement (https://acs.figshare.com/ndownloader/files/9246937)
Supplement: Supplementary file 1 [file 9246937]

## **Supplementary Information:**

### **Long-term and Programmable Bacterial Subculture in Completely Automated Microchemostats**

Minseok Kim<sup>1†</sup>, Juyeol Bae<sup>1</sup>, and Taesung Kim<sup>1,2\*</sup>

<sup>1</sup>Department of Mechanical Engineering, Ulsan National Institute of Science and Technology (UNIST), 50 UNIST-gil, Ulsan 44919, Republic of Korea

<sup>2</sup>Department of Biomedical Engineering, Ulsan National Institute of Science and Technology (UNIST), 50 UNIST-gil, Ulsan 44919, Republic of Korea

<sup>†</sup>Current affiliation:

Department of Medical Device, Daegu Research Center for Medical Devices and Rehabilitation Engineering, Korea Institute of Machinery & Materials, 330 Techno Sunhwan-ro, Yuga-myeon, Dalsung-gun, Daegu 42994, Republic of Korea.

\*Correspondence:

Taesung Kim  
Department of Mechanical Engineering  
Ulsan National Institute of Science and Technology (UNIST)  
50 UNIST-gil, Ulsan 44919, Republic of Korea  
E-mail: [tskim@unist.ac.kr](mailto:tskim@unist.ac.kr)  
Tel.: +82-52-217-2313  
Fax: +82-52-217-2409

## **Contents**

**Supplementary Figures S1 and S2**

**Supplementary Table S1**

**Supplementary Video S1:** Bacterial dilution for subculture programming by pressurization, depressurization, and repressurization cycles.

## Supplementary Figures

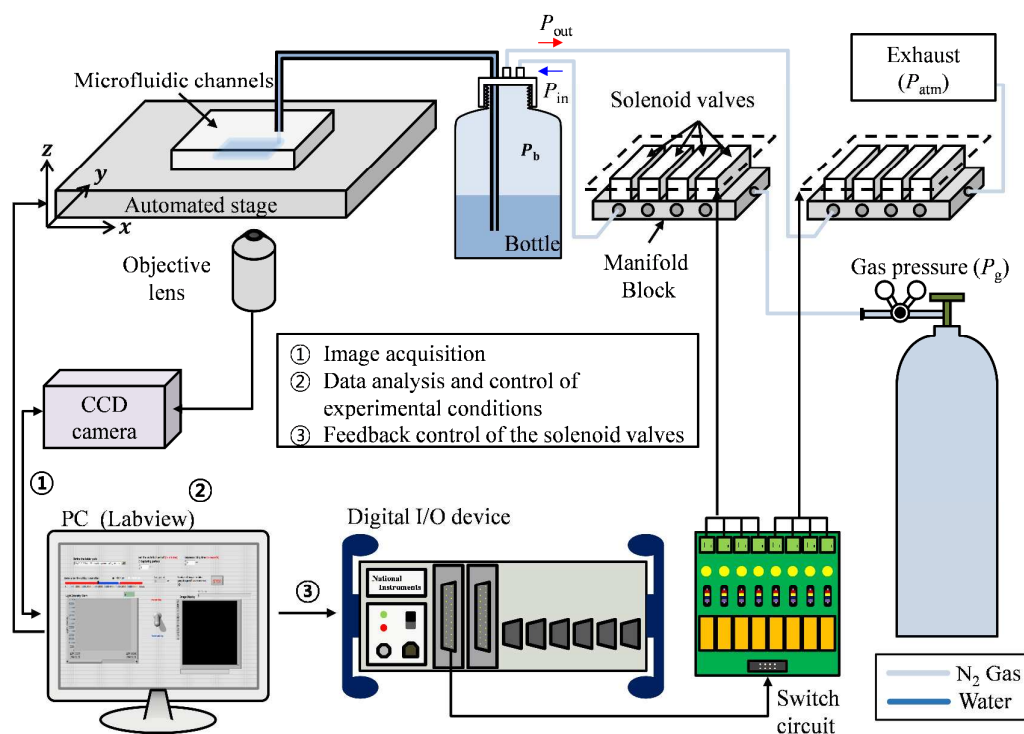

**Figure S1.** Experimental setup for real-time population measurement and *in situ*, closed-loop, and feedback control of bacterial population. Experimental setup for real-time and closed-loop programming of bacterial subculture. A customized LabVIEW program was used to obtain microscopic images with a CCD camera and then measured their fluorescence intensities in the region of interest. The quantified fluorescence information was used to manipulate solenoid valves for feedback control. During chemostat cultures, the input solenoid valves were normally opened while the output solenoid valves were closed. As a result, the pressure in the bottle ( $P_b$ ) remained the same as the gas pressure ( $P_g$ ). Subsequently, the control channel could be pressurized by an incompressible water solution in the bottle, which kept the chemostat chamber closed. For bacterial dilutions, the input solenoid valves were closed while the output solenoid valves were temporally opened to exhaust the compressed gas in the bottle. This resulted in a momentary equilibrium with atmosphere pressure ( $P_{atm}$ ). The source pressure from the gas tank could be adjusted using a manual regulator.

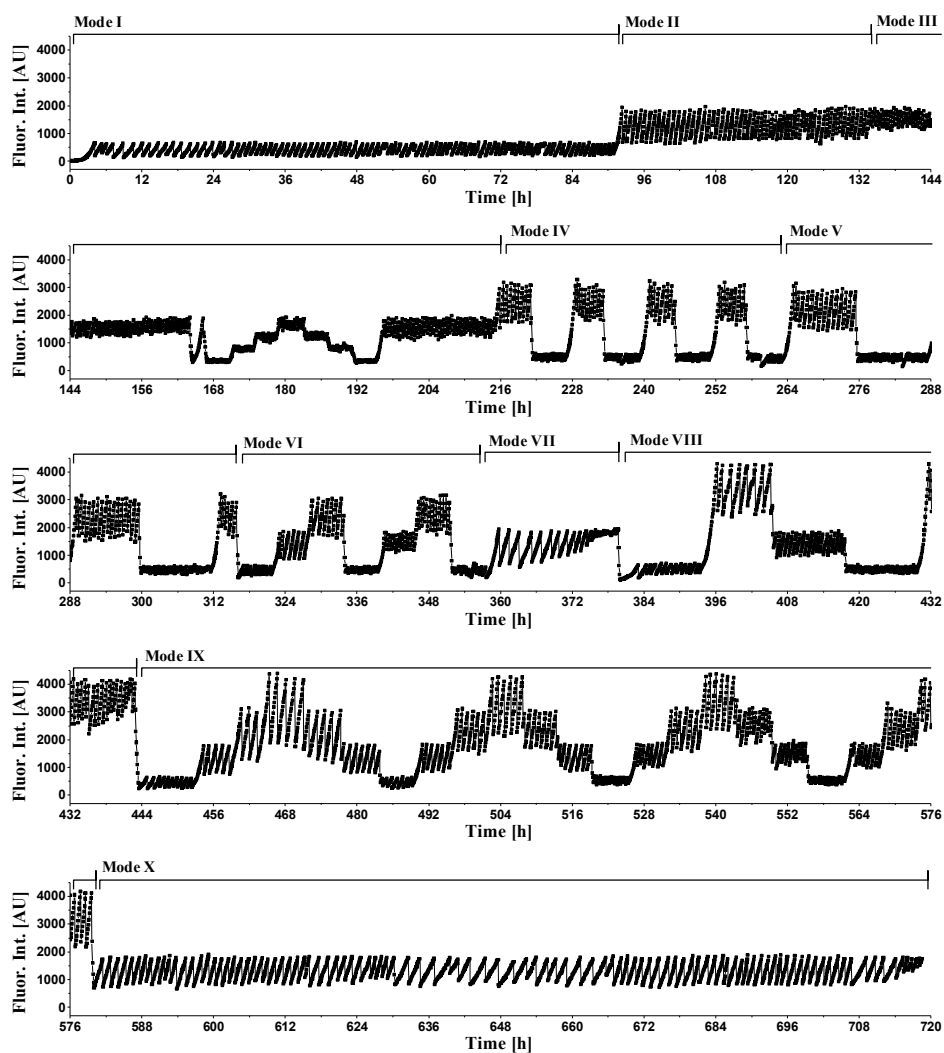

**Figure S2.** Ultra-long-term bacterial culture. Fully automated and continuous bacterial population growth and subculture programming over 720 h (30 days). During the ultra-long-term cultures, 10 subculture modes were demonstrated (“Mode I” through “Mode X”).

## Supplementary Table

**Table S1.** Ten representative subculture modes, experimental conditions used, and analysis results are summarized from the full growth behaviour and subculture programming data in Figure S2.

| Mode (period)               | Subculture results | Experimental conditions and analysis results                                                                                                                                                                                                                                                                                                                                                                                                    | Remarks and potential applications                                                                                                                                                                                             |
|-----------------------------|--------------------|-------------------------------------------------------------------------------------------------------------------------------------------------------------------------------------------------------------------------------------------------------------------------------------------------------------------------------------------------------------------------------------------------------------------------------------------------|--------------------------------------------------------------------------------------------------------------------------------------------------------------------------------------------------------------------------------|
| <b>I</b><br>(0–90 h)        |                    | <ul style="list-style-type: none"> <li>FI<sub>set</sub> = 600</li> <li>t<sub>open</sub> = 2.5 s, t<sub>capture</sub> = 5 min, Q = 25 μL/h</li> <li>CC5<sup>†</sup> = 1× TB with 1× ampicillin</li> <li>FI<sub>max</sub> = 628 ± 12, FI<sub>min</sub> = 228 ± 22</li> <li>Δt = 0.84 ± 0.11 [h],</li> <li>μ = 1.21 [1/h]</li> <li>m = 476 ± 41 [AU/h]</li> </ul>                                                                                  | <ul style="list-style-type: none"> <li>- 38.9% volume fraction (38.9%)</li> <li>- Potential applications in analysis of cellular growth kinetics<sup>1</sup></li> </ul>                                                        |
| <b>II</b><br>(90–133 h)     |                    | <ul style="list-style-type: none"> <li>FI<sub>set</sub> = 1700</li> <li>t<sub>open</sub> = 2.5 s, t<sub>capture</sub> = 5 min, Q = 25 μL/h</li> <li>CC = 1× TB with 1× ampicillin</li> <li>FI<sub>max</sub> = 1795 ± 36, FI<sub>min</sub> = 801 ± 27</li> <li>Δt = 0.66 ± 0.06 [h],</li> <li>μ = 1.22 [1/h]</li> <li>m = 1506 ± 99 [AU/h]</li> </ul>                                                                                            | <ul style="list-style-type: none"> <li>- Increased FI<sub>set</sub> value</li> <li>- Conservation of the volume fraction rate (40.7%)</li> </ul>                                                                               |
| <b>III-1</b><br>(133–143 h) |                    | <ul style="list-style-type: none"> <li>FI<sub>set</sub> = 1700</li> <li>t<sub>open</sub> = 1.5 s, t<sub>capture</sub> = 5 min, Q = 25 μL/h</li> <li>CC = 1× TB with 1× ampicillin</li> <li>FI<sub>max</sub> = 1805 ± 32, FI<sub>min</sub> = 1277 ± 36</li> <li>Δt = 0.29 ± 0.03 [h],</li> <li>μ = 1.19 [1/h]</li> <li>m = 1820 ± 124 [AU/h]</li> </ul>                                                                                          | <ul style="list-style-type: none"> <li>- ½ chamber opening time</li> <li>- 1× antibiotic dose</li> </ul>                                                                                                                       |
| <b>III-2</b><br>(143–153 h) |                    | <ul style="list-style-type: none"> <li>t<sub>open</sub> = 1.5 s, t<sub>capture</sub> = 5 min, Q = 25 μL/h</li> <li>CC = 1× TB with 2× ampicillin</li> <li>FI<sub>max</sub> = 1751 ± 23, FI<sub>min</sub> = 1290 ± 25</li> <li>Δt = 0.44 ± 0.05 [h],</li> <li>μ = 0.69 [1/h]</li> <li>m = 1047 ± 68 [AU/h]</li> </ul>                                                                                                                            | <ul style="list-style-type: none"> <li>- 2× antibiotic dose</li> <li>- Potential applications in antibiotic susceptibility tests<sup>2</sup></li> </ul>                                                                        |
| <b>III-3</b><br>(153–164 h) |                    | <ul style="list-style-type: none"> <li>t<sub>open</sub> = 1.5 s, t<sub>capture</sub> = 5 min, Q = 25 μL/h</li> <li>CC = 1× TB with 2× ampicillin</li> <li>FI<sub>max</sub> = 1830 ± 23, AU<sub>min</sub> = 1334 ± 26</li> <li>Δt = 0.31 ± 0.02 [h],</li> <li>μ = 1.02 [1/h]</li> <li>m = 1600 ± 175 [AU/h]</li> </ul>                                                                                                                           | <ul style="list-style-type: none"> <li>- Adaptation to 2× antibiotic dose</li> <li>- Potential applications in evolutionary adaptation<sup>3</sup></li> </ul>                                                                  |
| <b>IV</b><br>(195–263 h)    |                    | <ul style="list-style-type: none"> <li>FI<sub>set</sub> = 550 (6 h) → 3000 (6 h)</li> <li>t<sub>open</sub> = 1.5 s, t<sub>capture</sub> = 5 min, Q = 25 μL/h</li> <li>CC = 1× TB with 2× ampicillin</li> <li>FI<sub>max</sub> = 587 ± 11 → 3061 ± 49</li> <li>FI<sub>min</sub> = 365 ± 26 → 1958 ± 77</li> <li>Δt = 0.44 ± 0.08 [h] → 0.43 ± 0.07 [h]</li> <li>μ = 1.08 [1/h] → 1.04 [1/h]</li> <li>m = 504 ± 21 → 2565 ± 345 [AU/h]</li> </ul> | <ul style="list-style-type: none"> <li>- μ<sub>AU</sub> = 1.10 recovery</li> <li>- Programming two FI<sub>set</sub> values</li> <li>- Potential applications in programmed bioprocess and biotechnology<sup>4</sup></li> </ul> |

|                            |                                                                                     |                                                                                                                                                                                                                                                                                                                                                                                                                                                                                                                                                                                                                                                                                                                                                                                                                                                                                                                                                                                                                                                                                                                                                                                                                                                                                                                                                                                                                                                                                           |                                              |
|----------------------------|-------------------------------------------------------------------------------------|-------------------------------------------------------------------------------------------------------------------------------------------------------------------------------------------------------------------------------------------------------------------------------------------------------------------------------------------------------------------------------------------------------------------------------------------------------------------------------------------------------------------------------------------------------------------------------------------------------------------------------------------------------------------------------------------------------------------------------------------------------------------------------------------------------------------------------------------------------------------------------------------------------------------------------------------------------------------------------------------------------------------------------------------------------------------------------------------------------------------------------------------------------------------------------------------------------------------------------------------------------------------------------------------------------------------------------------------------------------------------------------------------------------------------------------------------------------------------------------------|----------------------------------------------|
| <b>V</b><br>(263–316 h)    | 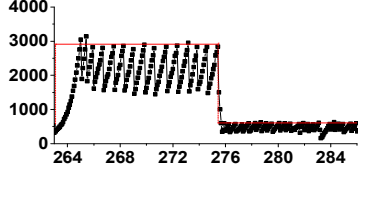   | <ul style="list-style-type: none"> <li>▪ <math>FI_{\text{set}} = 3000 \text{ (12 h)} \rightarrow 550 \text{ (12 h)}</math></li> <li>▪ <math>t_{\text{open}} = 1.5 \text{ s}</math>, <math>t_{\text{capture}} = 5 \text{ min}</math>, <math>Q = 25 \text{ } \mu\text{L/h}</math></li> <li>▪ CC = 1× TB with 2× ampicillin</li> <li>▪ <math>FI_{\text{max}} = 3074 \pm 50 \rightarrow 583 \pm 6</math></li> <li>▪ <math>FI_{\text{min}} = 1754 \pm 96 \rightarrow 362 \pm 16</math></li> <li>▪ <math>\Delta t = 0.51 \pm 0.07 \text{ [h]} \rightarrow 0.40 \pm 0.02 \text{ [h]}</math></li> <li>▪ <math>\mu = 1.10 \rightarrow 1.19 \text{ [/h]}</math></li> <li>▪ <math>m = 2588 \pm 300 \rightarrow 542 \pm 23 \text{ [AU/h]}</math></li> </ul>                                                                                                                                                                                                                                                                                                                                                                                                                                                                                                                                                                                                                                                                                                                                           | - Two-step programming with a 2×-long period |
| <b>VI</b><br>(316–358 h)   |    | <ul style="list-style-type: none"> <li>▪ <math>FI_{\text{set}} = 550 \text{ (6 h)} \rightarrow 1700 \text{ (6h)} \rightarrow 3000 \text{ (6 h)}</math></li> <li>▪ <math>t_{\text{open}} = 1.5 \text{ s}</math>, <math>t_{\text{capture}} = 5 \text{ min}</math>, <math>Q = 25 \text{ } \mu\text{L/h}</math></li> <li>▪ CC = 1× TB with 2× ampicillin</li> <li>▪ <math>FI_{\text{max}} = 574 \pm 22 \rightarrow 1783 \pm 25 \rightarrow 3021 \pm 45</math></li> <li>▪ <math>FI_{\text{min}} = 345 \pm 22 \rightarrow 1147 \pm 28 \rightarrow 1919 \pm 74</math></li> <li>▪ <math>\Delta t = 0.43 \pm 0.05 \rightarrow 0.41 \pm 0.10 \rightarrow 0.44 \pm 0.05 \text{ [h]}</math></li> <li>▪ <math>\mu = 1.18 \rightarrow 1.08 \rightarrow 1.03 \text{ [/h]}</math></li> <li>▪ <math>m = 542 \pm 77 \rightarrow 1699 \pm 182 \rightarrow 2539 \pm 179 \text{ [AU/h]}</math></li> </ul>                                                                                                                                                                                                                                                                                                                                                                                                                                                                                                                                                                                                      | - Three-step programming                     |
| <b>VII</b><br>(358–380 h)  |    | <ul style="list-style-type: none"> <li>▪ <math>FI_{\text{set}} = 1700</math></li> <li>▪ <math>t_{\text{open}} = 1.5 \text{ s}</math>, <math>t_{\text{capture}} = 5 \text{ min}</math>, <math>Q = 5\text{--}25 \text{ } \mu\text{L/h}</math></li> <li>▪ CC = 1× TB with 2× ampicillin</li> <li>▪ <math>FI_{\text{max}} = 1855 \pm 22</math></li> <li>▪ <math>FI_{\text{min}} = 1153 \pm 429</math></li> <li>▪ <math>\Delta t = [\text{h}] = 1.04 \pm 0.54</math></li> <li>▪ <math>\mu = 0.92 \text{ [/h]}</math></li> <li>▪ <math>m = 762 \pm 65 \text{ [AU/h]}</math></li> </ul>                                                                                                                                                                                                                                                                                                                                                                                                                                                                                                                                                                                                                                                                                                                                                                                                                                                                                                          | - Flow rate programming                      |
| <b>VIII</b><br>(380–444 h) |  | <ul style="list-style-type: none"> <li>▪ <math>FI_{\text{set}} = 550 \text{ (12 h)} \rightarrow 4000 \text{ (12 h)} \rightarrow 1700 \text{ (12 h)}</math></li> <li>▪ <math>t_{\text{open}} = 1.5 \text{ s}</math>, <math>t_{\text{capture}} = 5 \text{ min}</math>, <math>Q = 25 \text{ } \mu\text{L/h}</math></li> <li>▪ CC = 1× TB with 2× ampicillin</li> <li>▪ <math>FI_{\text{max}} = 614 \pm 23 \rightarrow 4102 \pm 71 \rightarrow 1778 \pm 30</math></li> <li>▪ <math>FI_{\text{min}} = 375 \pm 26 \rightarrow 2653 \pm 128 \rightarrow 1067 \pm 41</math></li> <li>▪ <math>\Delta t = 0.50 \pm 0.17 \rightarrow 0.50 \pm 0.11 \rightarrow 0.54 \pm 0.04 \text{ [h]}</math></li> <li>▪ <math>\mu = 0.99 \rightarrow 0.87 \rightarrow 0.95 \text{ [/h]}</math></li> <li>▪ <math>m = 528 \pm 50 \rightarrow 2261 \pm 323 \rightarrow 1299 \pm 54 \text{ [AU/h]}</math></li> </ul>                                                                                                                                                                                                                                                                                                                                                                                                                                                                                                                                                                                                  | - Three-step and nongradual programming      |
| <b>IX</b><br>(444–580 h)   |  | <ul style="list-style-type: none"> <li>▪ <math>FI_{\text{set}} = 550 \text{ (6h)} \rightarrow 1700 \text{ (6 h)} \rightarrow 3000 \text{ (6 h)} \rightarrow 4000 \text{ (6h)} \rightarrow 3000 \text{ (6h)} \rightarrow 1700 \text{ (6 h)} \rightarrow 550 \text{ (6 h)}</math></li> <li>▪ <math>t_{\text{open}} = 1.5 \text{ s}</math>, <math>t_{\text{capture}} = 5 \text{ min}</math>, <math>Q = 25 \text{ } \mu\text{L/h}</math></li> <li>▪ CC = 1× TB with 2× ampicillin</li> <li>▪ <math>FI_{\text{max}} = 650 \pm 27 \rightarrow 1824 \pm 38 \rightarrow 3050 \pm 61 \rightarrow 4308 \pm 46 \rightarrow 3039 \pm 62 \rightarrow 1843 \pm 52 \rightarrow 635 \pm 18</math></li> <li>▪ <math>FI_{\text{min}} = 423 \pm 31 \rightarrow 1060 \pm 59 \rightarrow 1649 \pm 60 \rightarrow 2046 \pm 43 \rightarrow 1727 \pm 195 \rightarrow 1087 \pm 115 \rightarrow 434 \pm 34</math></li> <li>▪ <math>\Delta t = 0.38 \pm 0.09 \rightarrow 0.55 \pm 0.08 \rightarrow 0.64 \pm 0.09 \rightarrow 0.76 \pm 0.14 \rightarrow 0.62 \pm 0.11 \rightarrow 0.57 \pm 0.04 \rightarrow 0.40 \pm 0.07 \text{ [h]}</math></li> <li>▪ <math>\mu = 1.13 \rightarrow 0.99 \rightarrow 0.96 \rightarrow 0.98 \rightarrow 0.91 \rightarrow 0.93 \rightarrow 0.95 \text{ [/h]}</math></li> <li>▪ <math>m = 597 \pm 39 \rightarrow 1389 \pm 123 \rightarrow 2189 \pm 44 \rightarrow 2976 \pm 122 \rightarrow 2116 \pm 129 \rightarrow 1326 \pm 31 \rightarrow 502 \pm 15 \text{ [AU/h]}</math></li> </ul> | - Multistep programming                      |

|                         |                                                                                   |                                                                                                                                                                                                                                                                                                                                                                                                                                                                                                                                                                                                                                                                                                                                                                                                                                                                                                                                                                                                                                                                                                                                                                                                                                                                                                   |                                                                                                                    |
|-------------------------|-----------------------------------------------------------------------------------|---------------------------------------------------------------------------------------------------------------------------------------------------------------------------------------------------------------------------------------------------------------------------------------------------------------------------------------------------------------------------------------------------------------------------------------------------------------------------------------------------------------------------------------------------------------------------------------------------------------------------------------------------------------------------------------------------------------------------------------------------------------------------------------------------------------------------------------------------------------------------------------------------------------------------------------------------------------------------------------------------------------------------------------------------------------------------------------------------------------------------------------------------------------------------------------------------------------------------------------------------------------------------------------------------|--------------------------------------------------------------------------------------------------------------------|
| <p>X<br/>(580–720h)</p> | 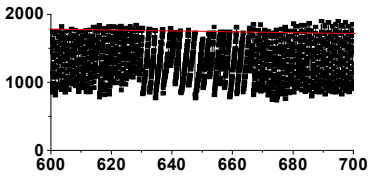 | <ul style="list-style-type: none"> <li>▪ <math>FI_{set} = 1800</math></li> <li>▪ <math>t_{open} = 1.5 \text{ s}</math>, <math>t_{capture} = 5 \text{ min}</math>, <math>Q = 25 \text{ } \mu\text{L/h}</math></li> <li>▪ CC = 1–0.2× TB with 2× ampicillin</li> <li>▪ <math>FI_{max} = 1758.7 \pm 61</math></li> <li>▪ <math>FI_{min} = 915 \pm 88</math></li> <li>▪ <math>\Delta t = 0.87 \pm 0.36</math></li> <li>▪ <math>\mu = 0.94 \text{ (1}\times\text{)} \rightarrow 0.95 \text{ (0.8}\times\text{)} \rightarrow 0.89 \text{ (0.6}\times\text{)} \rightarrow 0.81 \text{ (0.4}\times\text{)} \rightarrow 0.66 \text{ (0.2}\times\text{)} \rightarrow 0.62 \text{ (0.4}\times\text{)} \rightarrow 0.86 \text{ (0.6}\times\text{)} \rightarrow 0.98 \text{ (0.8}\times\text{)} \rightarrow 0.95 \text{ (1.0}\times\text{)} \text{ [1/h]}</math></li> <li>▪ <math>m = 1100 \text{ (1}\times\text{)} \rightarrow 1133 \text{ (0.8}\times\text{)} \rightarrow 1057 \text{ (0.6}\times\text{)} \rightarrow 902 \text{ (0.4}\times\text{)} \rightarrow 696 \text{ (0.2}\times\text{)} \rightarrow 629 \text{ (0.4}\times\text{)} \rightarrow 967 \text{ (0.6}\times\text{)} \rightarrow 1166 \text{ (0.8}\times\text{)} \rightarrow 1211 \text{ (1}\times\text{)} \text{ [AU/h]}</math></li> </ul> | <p>- Grow factor concentration programming<br/>- Potential applications in nutrient optimization<sup>5 6</sup></p> |
|-------------------------|-----------------------------------------------------------------------------------|---------------------------------------------------------------------------------------------------------------------------------------------------------------------------------------------------------------------------------------------------------------------------------------------------------------------------------------------------------------------------------------------------------------------------------------------------------------------------------------------------------------------------------------------------------------------------------------------------------------------------------------------------------------------------------------------------------------------------------------------------------------------------------------------------------------------------------------------------------------------------------------------------------------------------------------------------------------------------------------------------------------------------------------------------------------------------------------------------------------------------------------------------------------------------------------------------------------------------------------------------------------------------------------------------|--------------------------------------------------------------------------------------------------------------------|

<sup>†</sup>CC: culture condition.

Note that the culture temperature was fixed at 35°C unless otherwise indicated.

All the  $x$ - and  $y$ -axes of the graphs from I through X indicate the time in hours and the fluorescent intensity in arbitrary units (AU), respectively.

## References

- (1) Kovarova-Kovar, K; Egli, T. *Microbiol. Mol. Biol. R.* **1998**, 62, 646-666.
- (2) Barczak, A. K.; Gomez, J. E.; Kaufmann, B. B.; Hinson, E. E., Cosimi, L.; Borowsky, M. L.; Onderdonk, A. B.; Stanley, S. A.; Kaur, D.; Bryant, K. F.; Knipe, D. M.; Sloutsky, A.; Hung, D. T. *Proc. Nat. Acad. Sci. USA.* **2012**, 109, 6217-6222.
- (3) Toft, C; Andersson, S. G. E. *Nat. Rev. Genet.* **2010**, 11, 465-475.
- (4) Linko, P.; Zhu, Y. H. *J. Biotechnol.* **1991**, 21, 253-269.
- (5) Sirisantimethako, L.; Sanchanda, P.; Chatleudmongkol, J.; Laopaiboon, L.; Laopaiboon, P. *Curr. Opin. Biotech.* **2013**, 24, 137-137.
- (6) Li, Y. Q.; Jiang, H. X.; Xu, Y. Q.; Zhang, X. H. *Appl. Microbiol. Biot.* **2008**, 77, 1207-1217.
